# Supplementary material for: Effect of the electric field during annealing of organic light emitting diodes for improving its on/off ratio
Source: Royal Society of Chemistry journal article supplement (doi:10.1039/c5cp06637a), 2015-12-18
Supplement: c5cp06637a1.pdf [file c5cp06637a1.pdf]

Supplementary Information

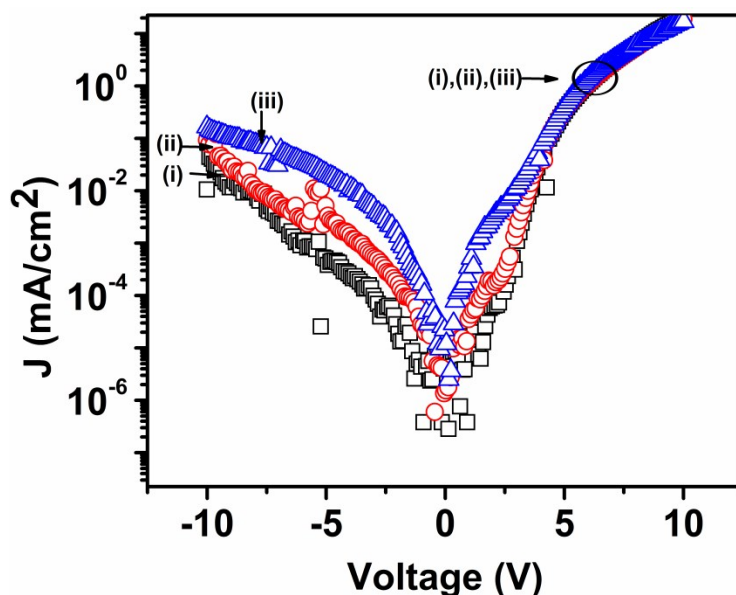

Fig. S1 Current density-voltage characteristics of devices i, ii and iii

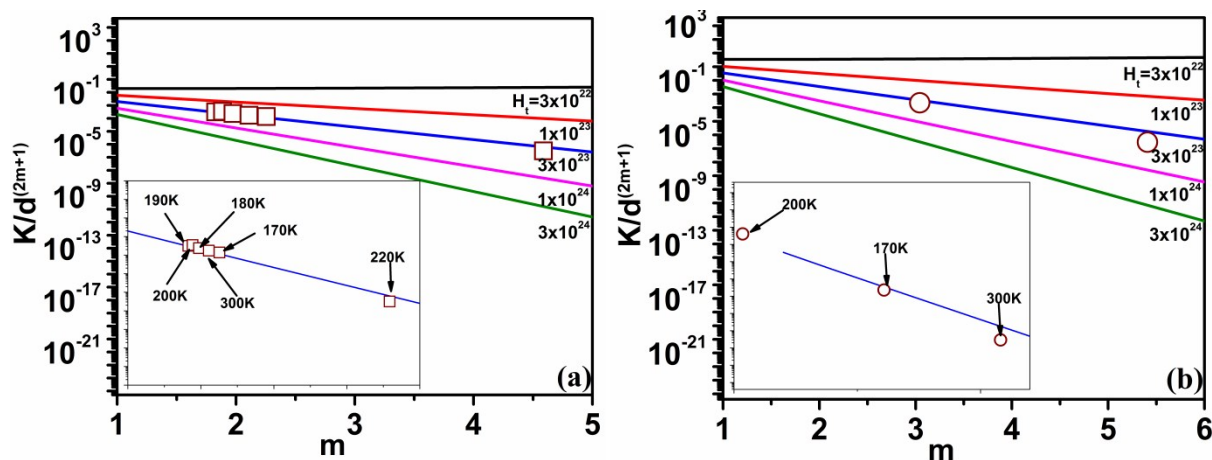

Fig. S2 Variation of  $K/d^{(2m+1)}$  with  $m$  to find the trap density in  $\text{Alq}_3$  device at various temperatures (a) before annealing and (b) after annealing. The inset gives the different temperature values corresponding to the measured points (All quantities in SI units)

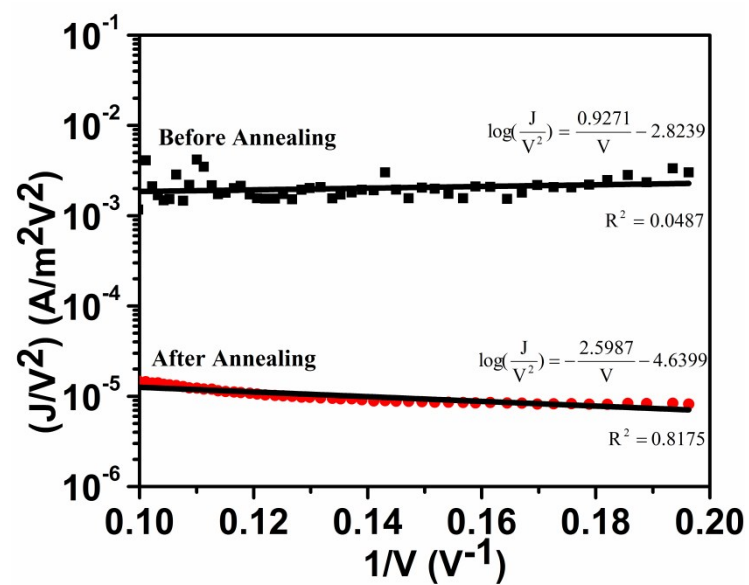

Fig.S3 Fit for tunneling injection in m-MTDATA single layer device before and after annealing.
